# Supplementary material for: Surface Pre-Reacted Glass Filler Contributes to Tertiary Dentin Formation through a Mechanism Different Than That of Hydraulic Calcium-Silicate Cement
Source: PubMed Central journal article supplement (PMC6780685; doi:10.3390/jcm8091440), 2019-09-11
Supplement: jcm-08-01440-s001.pdf [file jcm-08-01440-s001.pdf]

A. Deferoxamine

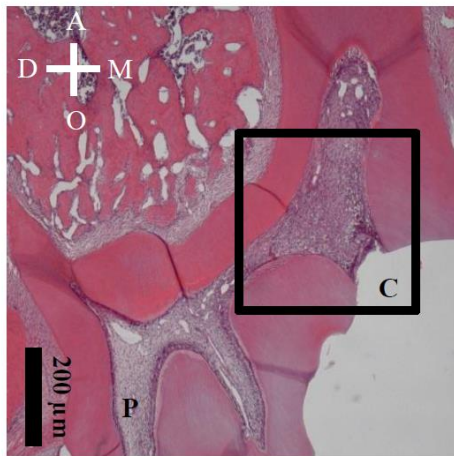

B. Deferoxamine

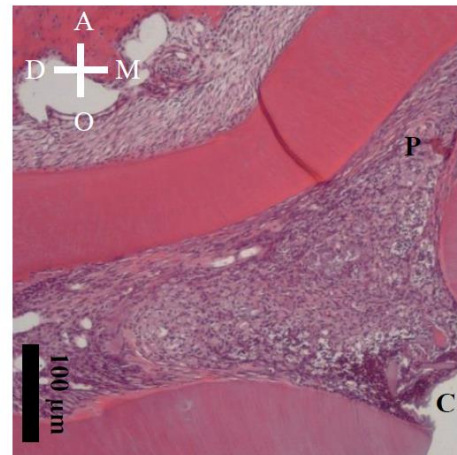

**Figure S1.** Representative histological images (H-E staining) after direct pulp capping using conventional glass-ionomer cement (Co-GIC) in 4-week samples. Sagittal sections (A) and magnified views of insets (B) are shown. Mineralized tissue was not induced beneath cavity. This result is consistent with the fact that CO-GIC is not accepted as a direct capping material. C = cavity, P = pulp, D = distal, M = mesial, O = occlusal, A = apical.
